# Supplementary material for: HSD17B7 gene in self‐renewal and oncogenicity of keratinocytes from Black versus White populations
Source: PubMed Central journal article supplement (PMC8261506; doi:10.15252/emmm.202114133), 2021-06-29

Source Files - Fig 6D

sh Ctrl

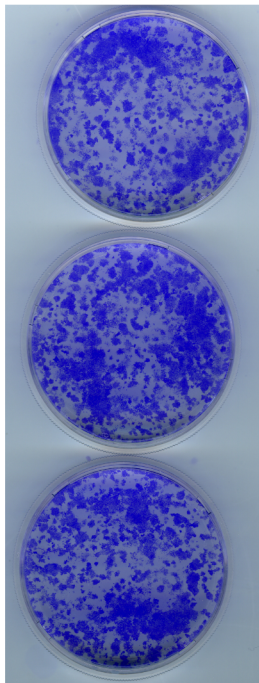

SCC13  
shHSD2

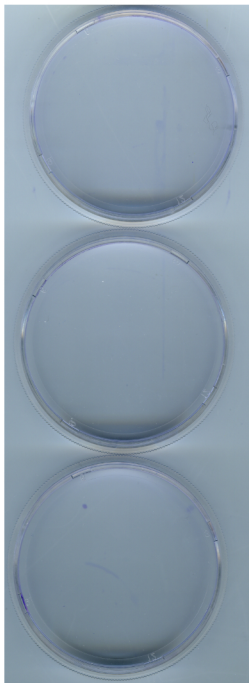

shHSD4

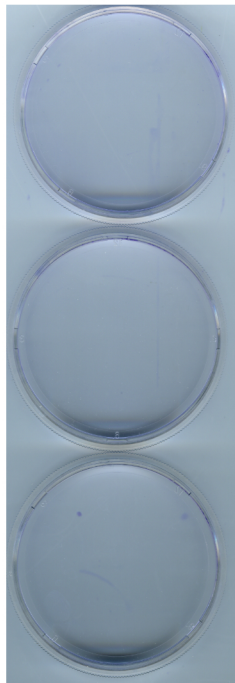

Supplement: EMMM-13-e14133-s003.pdf [file EMMM-13-e14133-s003.pdf]
