# Supplementary material for: HSD17B7 gene in self‐renewal and oncogenicity of keratinocytes from Black versus White populations
Source: PubMed Central journal article supplement (PMC8261506; doi:10.15252/emmm.202114133), 2021-06-29
Supplement: EMMM-13-e14133-s006.pdf [file EMMM-13-e14133-s006.pdf]

# HSD17B7 gene in self-renewal and oncogenicity of keratinocytes from Black versus White populations

Gian Paolo Dotto, Xiaoying Xu, Beatrice Tassone, Paola Ostano, Atul Katarkar, Tatiana Proust, Jean-Marc Joseph, Chiara Riganti, Giovanna Chiorino, Zoltan Kutalik, and Karine Lefort

DOI: [10.15252/emmm.202114133](https://doi.org/10.15252/emmm.202114133)

Corresponding author: Gian Paolo Dotto ([paolo.dotto@unil.ch](mailto:paolo.dotto@unil.ch))

---

|                         |                     |             |
|-------------------------|---------------------|-------------|
| <b>Review Timeline:</b> | Submission Date:    | 15th Feb 21 |
|                         | Editorial Decision: | 19th Mar 21 |
|                         | Revision Received:  | 29th Apr 21 |
|                         | Editorial Decision: | 5th May 21  |
|                         | Revision Received:  | 19th May 21 |
|                         | Accepted:           | 20th May 21 |

---

Editor: Lise Roth

## Transaction Report:

(Note: With the exception of the correction of typographical or spelling errors that could be a source of ambiguity, letters and reports are not edited. Depending on transfer agreements, referee reports obtained elsewhere may or may not be included in this compilation. Referee reports are anonymous unless the Referee chooses to sign their reports.)

19th Mar 2021

Dear Paolo,

Thank you for the submission of your manuscript to EMBO Molecular Medicine, and please accept my apologies for the delay in getting back to you, which is due to the fact that we were waiting for the report from the third referee. As we have not received this report yet and given that both referees #1 and #2 are overall positive, we prefer to make a decision now in order to avoid further delay in the process. Should referee #3 provide a report shortly, we will send it to you, with the understanding that we would not ask you for further-reaching experiments in addition to the ones required in the enclosed reports.

As you will see from the reports below, the referees acknowledge the interest of the study and are overall supporting publication of your work pending appropriate revisions. Addressing the reviewers' concerns in full will be necessary for further considering the manuscript in our journal. Acceptance of the manuscript will entail a second round of review. EMBO Molecular Medicine encourages a single round of revision only and therefore, acceptance or rejection of the manuscript will depend on the completeness of your responses included in the next, final version of the manuscript. For this reason, and to save you from any frustrations in the end, I would strongly advise against returning an incomplete revision.

When submitting your revised manuscript, please carefully review the instructions that follow below. Failure to include requested items will delay the evaluation of your revision:

- 1) A .docx formatted version of the manuscript text (including legends for main figures, EV figures and tables). Please make sure that the changes are highlighted to be clearly visible.
- 2) Individual production quality figure files as .eps, .tif, .jpg (one file per figure).
- 3) A .docx formatted letter INCLUDING the reviewers' reports and your detailed point-by-point responses to their comments. As part of the EMBO Press transparent editorial process, the point-by-point response is part of the Review Process File (RPF), which will be published alongside your paper.
- 4) A complete author checklist, which you can download from our author guidelines (<https://www.embopress.org/page/journal/17574684/authorguide#submissionofrevisions>). Please insert information in the checklist that is also reflected in the manuscript. The completed author checklist will also be part of the RPF.
- 5) Before submitting your revision, primary datasets produced in this study need to be deposited in an appropriate public database (see <https://www.embopress.org/page/journal/17574684/authorguide#dataavailability>). Please remember to provide a reviewer password if the datasets are not yet public. The accession numbers and database should be listed in a formal "Data Availability" section (placed after Materials & Method). Please note that the Data Availability Section is restricted to new primary data that are part of this study.

\*\*\* Note - All links should resolve to a page where the data can be accessed. \*\*\*

6) We would also encourage you to include the source data for figure panels that show essential data. Numerical data should be provided as individual .xls or .csv files (including a tab describing the data). For blots or microscopy, uncropped images should be submitted (using a zip archive if multiple images need to be supplied for one panel). Additional information on source data and instruction on how to label the files are available at .

7) Our journal encourages inclusion of \*data citations in the reference list\* to directly cite datasets that were re-used and obtained from public databases. Data citations in the article text are distinct from normal bibliographical citations and should directly link to the database records from which the data can be accessed. In the main text, data citations are formatted as follows: "Data ref: Smith et al, 2001" or "Data ref: NCBI Sequence Read Archive PRJNA342805, 2017". In the Reference list, data citations must be labeled with "[DATASET]". A data reference must provide the database name, accession number/identifiers and a resolvable link to the landing page from which the data can be accessed at the end of the reference. Further instructions are available at .

8) We replaced Supplementary Information with Expanded View (EV) Figures and Tables that are collapsible/expandable online. A maximum of 5 EV Figures can be typeset. EV Figures should be cited as 'Figure EV1, Figure EV2" etc... in the text and their respective legends should be included in the main text after the legends of regular figures.

- For the figures that you do NOT wish to display as Expanded View figures, they should be bundled together with their legends in a single PDF file called \*Appendix\*, which should start with a short Table of Content. Appendix figures should be referred to in the main text as: "Appendix Figure S1, Appendix Figure S2" etc.

- Additional Tables/Datasets should be labeled and referred to as Table EV1, Dataset EV1, etc. Legends have to be provided in a separate tab in case of .xls files. Alternatively, the legend can be supplied as a separate text file (README) and zipped together with the Table/Dataset file. See detailed instructions here:

9) The paper explained: EMBO Molecular Medicine articles are accompanied by a summary of the articles to emphasize the major findings in the paper and their medical implications for the non-specialist reader. Please provide a draft summary of your article highlighting

- the medical issue you are addressing,
- the results obtained and
- their clinical impact.

This may be edited to ensure that readers understand the significance and context of the research. Please refer to any of our published articles for an example.

10) For more information: There is space at the end of each article to list relevant web links for further consultation by our readers. Could you identify some relevant ones and provide such information as well? Some examples are patient associations, relevant databases, OMIM/proteins/genes links, author's websites, etc...

11) Every published paper now includes a 'Synopsis' to further enhance discoverability. Synopses are displayed on the journal webpage and are freely accessible to all readers. They include a short

stand first (maximum of 300 characters, including space) as well as 2-5 one-sentences bullet points that summarizes the paper. Please write the bullet points to summarize the key NEW findings. They should be designed to be complementary to the abstract - i.e. not repeat the same text. We encourage inclusion of key acronyms and quantitative information (maximum of 30 words / bullet point). Please use the passive voice. Please attach these in a separate file or send them by email, we will incorporate them accordingly.

Please also suggest a striking image or visual abstract to illustrate your article as a png file 550 px-wide x 400-px high.

12) As part of the EMBO Publications transparent editorial process initiative (see our Editorial at <http://embomolmed.embopress.org/content/2/9/329>), EMBO Molecular Medicine will publish online a Review Process File (RPF) to accompany accepted manuscripts.

In the event of acceptance, this file will be published in conjunction with your paper and will include the anonymous referee reports, your point-by-point response and all pertinent correspondence relating to the manuscript. Let us know whether you agree with the publication of the RPF and as here, if you want to remove or not any figures from it prior to publication.

Please note that the Authors checklist will be published at the end of the RPF.

EMBO Molecular Medicine has a "scooping protection" policy, whereby similar findings that are published by others during review or revision are not a criterion for rejection. Should you decide to submit a revised version, I do ask that you get in touch after three months if you have not completed it, to update us on the status.

I look forward to receiving your revised manuscript.

Yours sincerely,

Lise Roth

Lise Roth, PhD  
Editor  
EMBO Molecular Medicine

To submit your manuscript, please follow this link:

Link Not Available

\*Additional important information regarding Figures

Each figure should be given in a separate file and should have the following resolution:  
Graphs 800-1,200 DPI

Photos 400-800 DPI  
Colour (only CMYK) 300-400 DPI"

Figures are not edited by the production team. All lettering should be the same size and style; figure panels should be indicated by capital letters (A, B, C etc). Gridlines are not allowed except for log plots. Figures should be numbered in the order of their appearance in the text with Arabic numerals. Each Figure must have a separate legend and a caption is needed for each panel.

\*Additional important information regarding figures and illustrations can be found at <https://bit.ly/EMBOPressFigurePreparationGuideline>

\*\*\*\*\* Reviewer's comments \*\*\*\*\*

Referee #1 (Comments on Novelty/Model System for Author):

As described in the review, PCA needs to be moved up to first define genetic ancestry of individuals.

The reviewer does not have a background in experimental oncology and defers that evaluation to others.

Referee #1 (Remarks for Author):

Reviewer comment

Xu & Tassone et al. presented an intriguing study investigating the molecular differences observed in HKCs and HNSCCs or Black African vs. White Caucasian individuals. Combining in vitro, in vivo, and computational analyses, they were able to trace key differences to the HSD17B7 gene that have ancestry-associated eQTL. The manuscript is generally well-written and results well-presented. The reviewer has a background in cancer genomics, but not in experimental biology, and will focus on commenting on those sections.

Major:

1. As the author suggested, they "will be employing the term "ancestry" in reference to individuals with common genetic and phenotypic features rather than "race." The reviewer agree with this approach as race is a social construct, whereas genetic ancestry enables investigation of biological hypotheses. Given that the entire paper focused on comparing HKCs/HNSCCs across African and Caucasian ancestries, the authors should first define the African vs. Caucasian HKCs using genetic PCA (rather than "Black" and "White") before other analyses. This is a common practice in the human genetics field to avoid confounding and inaccuracy of self-reported race/ethnicity or potential samples swaps.

a. Typically admixed individuals (ex. >20% of other ancestry) would be separately analyzed. It seems from Fig 2B that roughly half of the individuals the authors defined as "Black" would be admixed. After first defining the ancestry, the author could either keep the two groups but define the African-ancestry group as "individuals with >x% African ancestry", or more appropriately, separate the African ancestry, admixed, and Caucasian individuals.

2. Why did the author choose HNSC for the human cohort analyses? Are there datasets of other keratinocyte cancers (especially those affecting the skin?)

3. Figure 3C, the survival analyses need to correct for at least ancestry, sex, etc (ex. a Cox model or a stratified model, given we already know HSD17B7 will confound with ancestry).

4. Figure 3K, all the SNP's correlation have the same color? Are those SNPs always on the same haplotype, if not, what are the actual R2 and D? Great they are able to trace it to ancestry-related SNPs as eQTLs.

#### Language

1. Take out "co-segregating" which may suggest it's a familial linkage study)
2. "An attractive possibility..." sounds odd, consider replacing with "We postulate that..."

#### Referee #2 (Comments on Novelty/Model System for Author):

The authors have done a good job in developing these models, as this question has not been tested functionally to my knowledge in previous studies.

I do have some reservations about the statistics of the eQTL analysis, and would suggest that this be reviewed by a specialist in the field. However I also believe that if this was excluded it would not seriously reduce the impact of the manuscript.

#### Referee #2 (Remarks for Author):

The manuscript from Xu et al addresses an important question related to the differences in tumor susceptibility driven by inherited polymorphic genetic variants linked to race/ethnicity. This is a very complex problem involving both genetic and environmental factors, compounded by socio-economic differences and other influences that have been very difficult to disentangle to identify underlying mechanisms. The authors have taken a direct route to this question by studying the effect of ancestry on properties associated with transformation and oncogenicity using keratinocyte cells derived from young male foreskins. Remarkably, they identify HSD17B7 as a polymorphic gene carrying a heritable polymorphism that in the black ancestry patients is linked to increased clonal growth, reduced differentiation and oxidative phosphorylation, and increased tumorigenic potential. The authors further show that manipulation of HSD17B7 levels alters these properties in human keratinocyte cultures, and suggest that HSD17B7 is a target for intervention to prevent the development of cancer in human populations.

Overall, there is a lot of work presented in this manuscript, and it will be of interest to the field of cancer susceptibility and prevention. There are however some points that should be clarified by the authors.

1. There appears to be an important error in the statement on p 11, which states:

" Testing 14 HKC strains of Black versus White individuals for mitochondrial electron transfer chain (ETC) activity showed consistently higher levels in cells of the former group, accompanied by higher ATP production and mitochondrial ROS levels (Figure 6A)."

Figure 6 in fact shows that ETC activity and ATP levels are higher in the latter (white) group rather than the former (black) group.

2. The analysis of Fig 2 states: "Out of a hallmark of 50 gene signatures from the Molecular

Signature Database (MSigDB 50 hallmarks: <https://www.gsea-msigdb.org/gsea/msigdb>), we found a significant enrichment (FDR<0.05) for a mitochondrial oxidative phosphorylation (OXPHOS) gene signature, with no significant enrichment for other signatures (Figure 2D):.

Could the authors clarify the directionality of this effect. From the figure it seems that the oxidative phosphorylation signature is INCREASED in the samples from black patients, whereas later figures stress that the samples from white patients have high oxidative phosphorylation and ATP levels.

3. The gene expression and eQTL data are difficult to evaluate and do not really contribute much to the argument. In Table 3, a large number of other SNPs have a more significant correlation with Hsd17b7 expression than those highlighted, so it is difficult to know how significant these are in the absence of further functional studies involving mutagenesis of the proposed functional binding sites surrounding the HSD17B7 gene.

4. Is there independent evidence from other data sources (eg GTEX) for the presence of these eQTLs and their significance?

5. Supp Table 2 shows that the fold change in level of expression of HSD17B7 between black and white populations is 1.7 or 1.4. Is this enough? In the transfection experiments the over-expression looks like several fold higher. Do the authors believe that 1.4 -1.7 fold is sufficient to explain the effects on clonal growth and metabolism?

6. The authors used data bases from other sources to support the conclusions regarding differential gene expression in their human keratinocytes (H&N cancer, 520 patients, TCGA Firehose Legacy). Were these all males or did they include both sexes? The data generated in the present study were all from males but I did not see a statement saying that females were excluded from the TCGA samples. If this was not done, how does gender affect the results?

**Referee #1 (Remarks for Author):**

*Xu & Tassone et al. presented an intriguing study investigating the molecular differences observed in HKCs and HNSCCs of Black African vs. White Caucasian individuals. Combining in vitro, in vivo, and computational analyses, they were able to trace key differences to the HSD17B7 gene that have ancestry-associated eQTL. The manuscript is generally well-written and results well-presented. The reviewer has a background in cancer genomics, but not in experimental biology, and will focus on commenting on those sections.*

**Major:**

*1. As the author suggested, they "will be employing the term "ancestry" in reference to individuals with common genetic and phenotypic features rather than "race." The reviewer agrees with this approach as race is a social construct, whereas genetic ancestry enables investigation of biological hypotheses. Given that the entire paper focused on comparing HKCs/HNSCCs across African and Caucasian ancestries, the authors should first define the African vs. Caucasian HKCs using genetic PCA (rather than "Black" and "White") before other analyses. This is a common practice in the human genetics field to avoid confounding and inaccuracy of self-reported race/ethnicity or potential sample swaps. a. Typically admixed individuals (ex. >20% of other ancestry) would be separately analyzed. It seems from Fig 2B that roughly half of the individuals the authors defined as "Black" would be admixed. After first defining the ancestry, the author could either keep the two groups but define the African-ancestry group as "individuals with >x% African ancestry", or more appropriately, separate the African ancestry, admixed, and Caucasian individuals.*

**Answer:** We thank the reviewer for the appreciation of our work and the constructive recommendations. As requested, we have moved the genotyping and population admixture analysis to the beginning of the results section, and subdivided our subsequent analysis of primary keratinocytes (HKC) from Black individuals on the basis of < or > 20% genome admixture.

As now stated at the beginning of the results (p. 5, line 13) and shown in the new Fig 1, "principal component analysis (PCA) of the SNP profiles showed excellent correspondence of genetic profiles with skin phototypes and patients' "self-reported" origins. Samples from individuals of White descent and skin phototypes 1 and 2 clustered tightly in one PCA group, while those of Black descent and skin phototypes 5 and 6 clustered separately, with three sub-groups matching geographic distributions of "self-reported" origin within the African continent (Fig 1A). Admixture analysis of the SNP genotype dataset was used to estimate genetic relatedness of donors, clustering them according to an increasing number of possible ancestral populations. With the simplest assumption of two ancestries ( $K = 2$ ), the genome of individuals of self-reported Black origin was found to harbor various levels of the White ancestry genome (Fig 1B). The findings are consistent with the greater genetic variation of Black African populations as we consider in the discussion (p. 15, line 17).

In terms of functional analysis, we now show that there are statistically significant differences in oncogenic potential of HKCs from White and Black individuals, considering the latter either as a total group or one with <20% genomic admixture (Fig 2A). Differences in clonogenicity and sphere forming capability between HKCs from White versus Black individuals, as a total group or one with < or > 20% genomic admixture, were all statistically significant (Fig 2E, F).



The transcriptomic profiles of HKC strains were already ordered according to the results of genome admixture analysis (Fig 3A). We have now also performed separate GO analysis of the profiles of HKCs from White versus Black individuals, considered as either a total group or one with <20% genomic admixture, finding similar or identical functional categories of genes in the two cases (Fig 3B).

2. *Why did the author choose HNSC for the human cohort analyses? Are there datasets of other keratinocyte cancers (especially those affecting the skin?)*

**Answer :** As indicated in the text (p. 8, line 13), we compared transcriptomic profiles of HKCs from Black versus White individuals with those of a large data set of Head and Neck SCCs (HNSCCs) from patients of the two ancestries (520 patients, 452 White, 48 Black; TCGA Firehose Legacy, November 2020, in cBioportal (Gao et al., 2013)). Transcriptomic profiles of esophageal and lung SCCs could not be similarly analyzed as only a few were from patients of Black descent (5 out of 114 esophageal SCCs; 31 out of 351 lung SCCs). Large skin SCC datasets with ancestry/survival information are not available, in either TCGA or other repositories (e.g. GEO, ArrayExpress).

3. *Figure 3C, the survival analyses need to correct for at least ancestry, sex, etc (ex. a Cox model or a stratified model, given we already know HSD17B7 will confound with ancestry).*

**Answer:** As recommended, we have looked into these other determinants of cancer susceptibility. Kaplan Mayer curves of patients' survival divided by sex show HSD17B7-dependent differences for both male and female patients (revised Fig 4B). As a second approach, multiple-variable Cox regression analysis was used to adjust for patients' sex, age and ancestry, or all three variables together, showing that even in these cases elevated HSD17B7 levels remain significantly associated with poor patients' survival (Fig 4C).

4. *Figure 3K, all the SNP's correlation have the same color? Are those SNPs always on the same haplotype, if not, what are the actual R2 and D? Great they are able to trace it to ancestry-related SNPs as eQTLs.*

**Answer:** We had used single Red and Blue colors for R2 and D' values, respectively, as both are close to upper limits. In revised Fig 4K, we are now showing shaded levels of color corresponding to the indicated gradient of values. The specific R2 and D' numbers are provided in Appendix Table S3.

#### *Language*

1. *Take out "co-segregating" which may suggest it's a familial linkage study)*

2. *"An attractive possibility..." sounds odd, consider replacing with "We postulate that..."*

**Answer :** We have removed the "co-segregating" from the text as recommended, and replaced "an attractive possibility" with "We postulate that..." (p5, line5).

#### **Referee #2 (Comments on Novelty/Model System for Author):**

*Referee #2 (Remarks for Author):*

*The manuscript from Xu et al addresses an important question related to the differences in tumor susceptibility driven by inherited polymorphic genetic variants linked to race/ethnicity. This is a very complex problem involving both genetic and environmental factors, compounded by socio-economic differences and other influences that have been very difficult to disentangle to identify underlying mechanisms. The authors have taken a direct route to this question by studying the effect of ancestry on properties associated with transformation and oncogenicity using keratinocyte cells derived from young male foreskins. Remarkably, they identify HSD17B7 as a polymorphic gene carrying a heritable polymorphism that in the black ancestry patients is linked to increased clonal growth, reduced differentiation and oxidative phosphorylation, and increased tumorigenic potential. The authors further show that manipulation of HSD17B7 levels alters these properties in human keratinocyte cultures, and suggest that HSD17B7 is a target for intervention to prevent the development of cancer in human populations.*

*Overall, there is a lot of work presented in this manuscript, and it will be of interest to the field of cancer susceptibility and prevention. There are however some points that should be clarified by the authors.*

*1. There appears to be an important error in the statement on p 11, which states: " Testing 14 HKC strains of Black versus White individuals for mitochondrial electron transfer chain (ETC) activity showed consistently higher levels in cells of the former group, accompanied by higher ATP production and mitochondrial ROS levels (Figure 6A)."*

*Figure 6 in fact shows that ETC activity and ATP levels are higher in the latter (white) group rather than the former (black) group.*

**Answer:** We thank the reviewer for pointing out the wrong wording in the text, which we have now rectified.

*2. The analysis of Fig 2 states: "Out of a hallmark of 50 gene signatures from the Molecular Signature Database (MSigDB 50 hallmarks: <https://www.gsea-msigdb.org/gsea/msigdb>), we found a significant enrichment (FDR<0.05) for a mitochondrial oxidative phosphorylation (OXPHOS) gene signature, with no significant enrichment for other signatures (Figure 2D)."*

*Could the authors clarify the directionality of this effect. From the figure it seems that the oxidative phosphorylation signature is INCREASED in the samples from black patients, whereas later figures stress that the samples from white patients have high oxidative phosphorylation and ATP levels.*

**Answer :** We thank the reviewer for the interesting question, which we have specifically addressed by additional data that we had obtained since submission of our manuscript. As we now indicate in the text (p.12, line 6), and show in the new Fig 7: while transcriptomic profiles of Black African versus Caucasian HKCs were distinguished by an OXPHOS related gene signature (Fig 3C). Many genes of the signature related to cellular respiration, electron transport chain and mitochondrial organization and biogenesis were more highly expressed in Black vs White HKCs and up-regulated in three strains of White HKCs by *HSD17B7* overexpression (Fig 7 and Appendix Table S1). Expression of the above genes may be inversely related to intrinsic levels of mitochondrial activity as possible compensatory mechanism as reported for mitochondria disorders and metabolic conditions resulting in

OXPHOS deficiency {Reinecke, 2009 #15586; Singh, 2020 #15585}. In fact, direct analysis of HKC strains of Black versus White individuals showed consistently lower levels of mitochondrial activity (Fig 8A), which were also reduced as a consequence of *HSD17B7* overexpression (Fig 8B,C).

*3. The gene expression and eQTL data are difficult to evaluate and do not really contribute much to the argument. In Table 3, a large number of other SNPs have a more significant correlation with Hsd17b7 expression than those highlighted, so it is difficult to know how significant these are in the absence of further functional studies involving mutagenesis of the proposed functional binding sites surrounding the HSD17B7 gene.*

**Answer :** In Appendix Table S3 we had included the results of significant cis-eQTLs for all the differentially expressed genes (164) found in Black versus White HKCs. Only 9 eQTLs were found to be associated with the *HSD17B7* locus (1 MB either side of the gene). This is more clearly indicated in title of Appendix Table S3 and, to avoid any confusion, we have added a second work sheet to the Appendix Table S3, listing only the 9 HSD17B7-associated eQTLs together with their ancestry distribution (Shown by Fst values). We have also added to the Appendix Table S3 a worksheet with the results of co-segregation analysis for the HSD17B7 e-QTLs, as shown in a graphic form in Fig 4K.

*4. Is there independent evidence from other data sources (eg GTEX) for the presence of these eQTLs and their significance?*

**Answer :** Yes, we looked at the 6 ancestry specific eQTLs for *HSD17B7* in the GTEX database and found that all of them are significantly associated with *HSD17B7* gene expression in multiple tissues including skin and surface epithelia (esophagus mucosa). The findings are now mentioned in the text (p. 10) and shown in Appendix Table S4.

*5. Supp Table 2 shows that the fold change in level of expression of HSD17B7 between black and white populations is 1.7 or 1.4. Is this enough? In the transfection experiments the over-expression looks like several fold higher. Do the authors believe that 1.4 -1.7 fold is sufficient to explain the effects on clonal growth and metabolism?*

**Answer :** 1.7 and 1.4 fold differences in *HSD17B7* expression levels are average values based on comparative analysis of all HKC strains and HNSCCs from the TCGA database, with variations in expression of the gene across samples significantly correlating with patients' survival and, in the case of HKCs, OXPHOS gene signature and clonogenic potential.

It would be very difficult if not impossible to reproduce the relative slight differences in levels of *HSD17B7* expression between HKCs of the two ancestries by lentiviral-mediated overexpression or silencing. We note that even the elevated lentiviral-mediated overexpression of *HSD17B7* enhanced stem cell potential of a number of HKC strains (of white origin) but not others, consistent with an interplay with other determinants of stem cell potential. More drastic effects were observed by the gene silencing approach across HKC strains of the two ancestries, unveiling its essential function in this cell type.

Overall, as we summarize at the beginning of the discussion (p. 15), "our combined evidence, stemming from analysis of keratinocytes and keratinocyte-derived tumors from individuals of Black African versus Caucasian ancestries, has led to a differentially expressed gene of unsuspected importance in control of keratinocyte stem cell and oncogenic potential as well mitochondrial OXPHOS activity ..... This gene is a likely co-determinant of the

observed differences between keratinocytes of the two ancestries in concert with other as yet to be determined factors”.

*6. The authors used data bases from other sources to support the conclusions regarding differential gene expression in their human keratinocytes (H&N cancer, 520 patients, TCGA Firehose Legacy). Were these all males or did they include both sexes? The data generated in the present study were all from males but I did not see a statement saying that females were excluded from the TCGA samples. If this was not done, how does gender affect the results?*

**Answer :** We thank the reviewer for the interesting question. As already indicated in reply to reviewer #1, we have looked into these and other determinants of cancer susceptibility. Kaplan Mayer curves of patients’ survival divided by sex show *HSD17B7*-dependent differences for both male and female patients (revised Fig 4B). As a second approach, multiple-variable Cox regression analysis was used to adjust for patients’ sex, age and ancestry, or all three variables together, showing that even in these cases elevated *HSD17B7* levels remain significantly associated with poor patients’ survival (Fig 4C).

5th May 2021

Dear Paolo,

Thank you for the submission of your revised manuscript to EMBO Molecular Medicine. We have now received the enclosed report from the referee who re-reviewed your manuscript. As you will see, this referee is supportive of publication, and I am therefore pleased to inform you that we will be able to accept your manuscript once the following editorial points will be addressed:

1/ Main manuscript text:

- Please answer/correct the changes suggested by our data editors in the main manuscript file (in track changes mode). This file will be sent to you in the next couple of days. Please use this file for any further modification.
- Please provide up to 5 keywords.
- Material and methods:
  - o Human samples: please include a statement that written informed consent was obtained from all subjects and that the experiments conformed to the principles set out in the WMA Declaration of Helsinki and the Department of Health and Human Services Belmont Report.
  - o Cells: please indicate the origin of the cells.
  - o Animals: please indicate the origin of the mice.
  - o Antibodies: please provide antibody dilutions.
- Thank you for providing a Data Availability section. Please note that data have to be made public before acceptance of the manuscript.

2/ Figures:

- Statistics: Please indicate in all main and appendix figures (or in their legends) the exact p= values (including non-significant p values, ns). You may provide these values as a supplemental table in the Appendix file.
- Please make sure that all figures/figure panels are referenced in the main text and in the chronological order in which the figures appear (callouts are missing for Fig 7A; Fig 7B is called out after Fig 9).
- The Appendix Tables S1, 3, 5 should be renamed "Dataset EV1, 2, 3".
- Appendix Tables S2 and 3 should be renamed "Table EV1 and 2".
- All appendix figures/tables and EV tables need their legends removed from the main manuscript file and added to the respective files.
- Appendix: please add a table of content.

3/ Checklist:

- Section D/8: please provide the housing and husbandry conditions of the mice.
- Section E/12: please include a statement that written informed consent was obtained from all subjects and that the experiments conformed to the principles set out in the WMA Declaration of Helsinki and the Department of Health and Human Services Belmont Report.

4/ Source Data: Thank you for providing raw data for Figure 6. Please upload them as one pdf file.

5/ The paper explained: EMBO Molecular Medicine articles are accompanied by a summary of the

articles to emphasize the major findings in the paper and their medical implications for the non-specialist reader. Please provide a draft summary of your article highlighting

- the medical issue you are addressing,
- the results obtained and
- their clinical impact.

This may be edited to ensure that readers understand the significance and context of the research. Please refer to any of our published articles for an example.

6/ Synopsis: I slightly edited your synopsis to fit our style and format, please let me know if you agree with the following:

Differences in individuals' cancer susceptibility can be attributed, in part, to specific genetic and epigenetic variations. Human populations of Black African ancestry have a higher risk of aggressive cancer of various types, including keratinocyte-derived squamous cell carcinomas (SCCs).

- Higher oncogenic and self-renewal potential with lower mitochondrial respiratory and OXPHOS activities were observed in keratinocytes from Black African versus White Caucasian individuals.
- HSD17B7 was the top-ranked differentially expressed gene in primary keratinocytes and Head/Neck SCCs from Black African versus Caucasian populations, with ancestry-specific eQTLs linked to its expression.
- HSD17B7 codes for a targetable enzyme involved in sex steroid and cholesterol biosynthesis.
- HSD17B7 was found to play a key role in control of keratinocyte stem cell and oncogenic potential as well as mitochondrial OXPHOS activity.

7/ As part of the EMBO Publications transparent editorial process initiative (see our Editorial at <http://embomolmed.embopress.org/content/2/9/329>), EMBO Molecular Medicine will publish online a Review Process File (RPF) to accompany accepted manuscripts.

This file will be published in conjunction with your paper and will include the anonymous referee reports, your point-by-point response and all pertinent correspondence relating to the manuscript. Let us know whether you agree with the publication of the RPF and as here, if you want to remove or not any figures from it prior to publication.

Please note that the Authors checklist will be published at the end of the RPF.

I look forward to receiving your revised manuscript.

With my best wishes,

Lise

Lise Roth, PhD  
Editor  
EMBO Molecular Medicine

To submit your manuscript, please follow this link:

Link Not Available

\*Additional important information regarding Figures

Each figure should be given in a separate file and should have the following resolution:

Graphs 800-1,200 DPI

Photos 400-800 DPI

Colour (only CMYK) 300-400 DPI"

Figures are not edited by the production team. All lettering should be the same size and style; figure panels should be indicated by capital letters (A, B, C etc). Gridlines are not allowed except for log plots. Figures should be numbered in the order of their appearance in the text with Arabic numerals. Each Figure must have a separate legend and a caption is needed for each panel.

\*Additional important information regarding figures and illustrations can be found at <https://bit.ly/EMBOPressFigurePreparationGuideline>

The system will prompt you to fill in your funding and payment information. This will allow Wiley to send you a quote for the article processing charge (APC) in case of acceptance. This quote takes into account any reduction or fee waivers that you may be eligible for. Authors do not need to pay any fees before their manuscript is accepted and transferred to our publisher.

\*\*\*\*\* Reviewer's comments \*\*\*\*\*

Referee #1 (Remarks for Author):

I am satisfied with the revised manuscript. The authors are to be congratulated on this impressive body of work combining a new cohort, genomics, and biochemical experiment.

The authors performed the requested editorial changes.



20th May 2021

Dear Paolo,

I am very pleased to inform you that your manuscript is now accepted for publication and will be sent to our publisher to be included in the next available issue of EMBO Molecular Medicine!

We would like to remind you that as part of the EMBO Publications transparent editorial process initiative, EMBO Molecular Medicine will publish a Review Process File online to accompany accepted manuscripts. If you do NOT want the file to be published or would like to exclude figures, please immediately inform the editorial office via e-mail.

Congratulations on your interesting work!

With my best wishes,

Lise

Lise Roth, Ph.D  
Editor  
EMBO Molecular Medicine

Follow us on Twitter @EmboMolMed  
Sign up for eTOCs at [embopress.org/alertsfeeds](http://embopress.org/alertsfeeds)

**YOU MUST COMPLETE ALL CELLS WITH A PINK BACKGROUND ↓**  
PLEASE NOTE THAT THIS CHECKLIST WILL BE PUBLISHED ALONGSIDE YOUR PAPER

Corresponding Author Name: Gian Paolo Dotto

Journal Submitted to: EMBO Molecular Medicine

Manuscript Number: EMM-2021-14133-V2

**Reporting Checklist For Life Sciences Articles (Rev. June 2017)**

This checklist is used to ensure good reporting standards and to improve the reproducibility of published results. These guidelines are consistent with the Principles and Guidelines for Reporting Preclinical Research issued by the NIH in 2014. Please follow the journal's authorship guidelines in preparing your manuscript.

**A- Figures****1. Data**

The data shown in figures should satisfy the following conditions:

- the data were obtained and processed according to the field's best practice and are presented to reflect the results of the experiments in an accurate and unbiased manner.
- figure panels include only data points, measurements or observations that can be compared to each other in a scientifically meaningful way.
- graphs include clearly labeled error bars for independent experiments and sample sizes. Unless justified, error bars should not be shown for technical replicates.
- if  $n < 5$ , the individual data points from each experiment should be plotted and any statistical test employed should be justified.
- Source Data should be included to report the data underlying graphs. Please follow the guidelines set out in the author ship guidelines on Data Presentation.

**2. Captions**

Each figure caption should contain the following information, for each panel where they are relevant:

- a specification of the experimental system investigated (eg cell line, species name).
- the assay(s) and method(s) used to carry out the reported observations and measurements
- an explicit mention of the biological and chemical entity(ies) that are being measured.
- an explicit mention of the biological and chemical entity(ies) that are altered/ varied/ perturbed in a controlled manner.
- the exact sample size (n) for each experimental group/condition, given as a number, not a range;
- a description of the sample collection allowing the reader to understand whether the samples represent technical or biological replicates (including how many animals, litters, cultures, etc.).
- a statement of how many times the experiment shown was independently replicated in the laboratory.
- definitions of statistical methods and measures:
  - common tests, such as t-test (please specify whether paired vs. unpaired), simple  $\chi^2$  tests, Wilcoxon and Mann-Whitney tests, can be unambiguously identified by name only, but more complex techniques should be described in the methods section;
  - are tests one-sided or two-sided?
  - are there adjustments for multiple comparisons?
  - exact statistical test results, e.g., P values = x but not P values < x;
  - definition of 'center values' as median or average;
  - definition of error bars as s.d. or s.e.m.

Any descriptions too long for the figure legend should be included in the methods section and/or with the source data.

In the pink boxes below, please ensure that the answers to the following questions are reported in the manuscript itself. Every question should be answered. If the question is not relevant to your research, please write NA (non applicable). We encourage you to include a specific subsection in the methods section for statistics, reagents, animal models and human subjects.

**B- Statistics and general methods**

Please fill out these boxes ↓ (Do not worry if you cannot see all your text once you press return)

|                                                                                                                                                                                         |                                                                                                                                                                                                                                                                                                                                                                                                                                                                                                                                      |
|-----------------------------------------------------------------------------------------------------------------------------------------------------------------------------------------|--------------------------------------------------------------------------------------------------------------------------------------------------------------------------------------------------------------------------------------------------------------------------------------------------------------------------------------------------------------------------------------------------------------------------------------------------------------------------------------------------------------------------------------|
| 1.a. How was the sample size chosen to ensure adequate power to detect a pre-specified effect size?                                                                                     | For sample size computation, we started from the assumption of 25000 protein-coding genes tested, with an acceptable percentage of false positives equal to 0.05, a desired fold differences of 1.5, a power of 0.8 and a standard deviation of 0.7. According to these parameters, the sample size per group should be higher than 23 (in our case we have 26 samples from white individuals and 28 samples from black individuals).                                                                                                |
| 1.b. For animal studies, include a statement about sample size estimate even if no statistical methods were used.                                                                       | The sample size for animal experiments was estimated based on previous experiments of the same type in order to obtain statistically relevant data.                                                                                                                                                                                                                                                                                                                                                                                  |
| 2. Describe inclusion/exclusion criteria if samples or animals were excluded from the analysis. Were the criteria pre-established?                                                      | No exclusion criteria were adopted for animal studies and sample collection.                                                                                                                                                                                                                                                                                                                                                                                                                                                         |
| 3. Were any steps taken to minimize the effects of subjective bias when allocating animals/samples to treatment (e.g. randomization procedure)? If yes, please describe.                | To all samples and animals have been given a numeric code in order to minimize the subjective bias when treating them. Animals were allocated, when possible, in the same cage (groups max. 5 animals per cage), within same age bracket.                                                                                                                                                                                                                                                                                            |
| For animal studies, include a statement about randomization even if no randomization was used.                                                                                          | Animals were randomized while separating them into different experimental groups. Each animal received two contralateral injections in order to have in the same subject both control condition and treatment (ex. HSD-oe vs Ctrl) or two compared groups (ex. Black vs White).                                                                                                                                                                                                                                                      |
| 4.a. Were any steps taken to minimize the effects of subjective bias during group allocation or/and when assessing results (e.g. blinding of the investigator)? If yes please describe. | To minimize the effects of subjective bias when assessing results in certain experiments (ex. metabolic analyses) we performed blinding of the investigator by giving an unrelated numerical code to the samples. In addition, when possible, for the different HKC strains we named with a code unrelated to their phenotype (numeric code, unrelated), and we coupled the information regarding ancestry at the end of the experiment. For animal studies, we took randomly Black and White HKC strains for each group comparison. |
| 4.b. For animal studies, include a statement about blinding even if no blinding was done                                                                                                | For animal studies, allocation concealment was applied. During the conduct of the experiment, animal care staff were unaware of allocation groups to ensure that all animals in the experiments were handled, monitored and treated in the same way.                                                                                                                                                                                                                                                                                 |
| 5. For every figure, are statistical tests justified as appropriate?                                                                                                                    | For every figure the statistical tests performed have been considered as appropriate by the type of data that we obtained (comparison of two independent groups) or by previously published analyses with the same strategy.                                                                                                                                                                                                                                                                                                         |
| Do the data meet the assumptions of the tests (e.g., normal distribution)? Describe any methods used to assess it.                                                                      | We performed normal distribution test using following tests: Anderson-Darling test, D'Agostino&Pearson test, Shapiro-Wilk test and Kolmogorov-Smirnov test. For the data that do meet the normal distribution, we used parametric tests to assess the significance. For the data which does not meet the normal distribution (ex. Nodule size), we used nonparametric tests (ex. Mann-Whitney test) to assess the significance.                                                                                                      |

**USEFUL LINKS FOR COMPLETING THIS FORM**

<http://www.antibodypedia.com>  
<http://1degreebio.org>  
<http://www.equator-network.org/reporting-guidelines/improving-bioscience-research-repor>

<http://grants.nih.gov/grants/olaw/olaw.htm>  
<http://www.mrc.ac.uk/Ourresearch/Ethicsresearchguidance/Useofanimals/index.htm>  
<http://ClinicalTrials.gov>  
<http://www.consort-statement.org>  
<http://www.consort-statement.org/checklists/view/32-consort/66-title>

<http://www.equator-network.org/reporting-guidelines/reporting-recommendations-for-tum>  
<http://datadrivad.org>

<http://figshare.com>  
<http://www.ncbi.nlm.nih.gov/gap>

<http://www.ebi.ac.uk/ega>

<http://biomodels.net/>

<http://biomodels.net/miriam/>  
<http://jii.biochem.sun.ac.za>  
[http://oba.od.nih.gov/biosecurity/biosecurity\\_documents.html](http://oba.od.nih.gov/biosecurity/biosecurity_documents.html)  
<http://www.selectagents.gov/>

|                                                                                   |                                                                                                                                                                               |
|-----------------------------------------------------------------------------------|-------------------------------------------------------------------------------------------------------------------------------------------------------------------------------|
| Is there an estimate of variation within each group of data?                      | For gene expression data, within-group variation was established by calculating the coefficient of variation that was, on average, 0.09 for both white and black individuals. |
| Is the variance similar between the groups that are being statistically compared? | For gene expression profiling, variance between white and black individuals is globally similar, as assessed by Levene's test.                                                |

#### C- Reagents

|                                                                                                                                                                                                                                                                                                                              |                                                                                                                                                                           |
|------------------------------------------------------------------------------------------------------------------------------------------------------------------------------------------------------------------------------------------------------------------------------------------------------------------------------|---------------------------------------------------------------------------------------------------------------------------------------------------------------------------|
| 6. To show that antibodies were profiled for use in the system under study (assay and species), provide a citation, catalog number and/or clone number, supplementary information or reference to an antibody validation profile. e.g., Antibodypedia (see link list at top right), 1DegreeBio (see link list at top right). | For each antibody used in this study catalog number is provided.                                                                                                          |
| 7. Identify the source of cell lines and report if they were recently authenticated (e.g., by STR profiling) and tested for mycoplasma contamination.                                                                                                                                                                        | Skin and Oral SCC cells were obtained and cultured as previously described (Al Labban et al., 2018). All lines were tested monthly for mycoplasma contamination (by PCR). |

\* for all hyperlinks, please see the table at the top right of the document

#### D- Animal Models

|                                                                                                                                                                                                                                                                                                                                                                                    |                                                                                                                                                                                                                                                                                                                                                                                                                                                                                                                                                                                                                                                                                                     |
|------------------------------------------------------------------------------------------------------------------------------------------------------------------------------------------------------------------------------------------------------------------------------------------------------------------------------------------------------------------------------------|-----------------------------------------------------------------------------------------------------------------------------------------------------------------------------------------------------------------------------------------------------------------------------------------------------------------------------------------------------------------------------------------------------------------------------------------------------------------------------------------------------------------------------------------------------------------------------------------------------------------------------------------------------------------------------------------------------|
| 8. Report species, strain, gender, age of animals and genetic modification status where applicable. Please detail housing and husbandry conditions and the source of animals.                                                                                                                                                                                                      | All animals were housed, bred and subjected to listed procedures in the animal facility of the University of Lausanne with institutional board approval. Female NOD/SCID mice (7-10weeks) were used for xenograft experiments. Mice were housed in transparent cages provided with enough space to exercise and have normal social behaviour. One or more shelters have been provided to encourage exploration, facilitate resting and provide refuge. Cage were ventilated, softly lit and subjected to a light-dark cycle, with controlled conditions of temperature and humidity. Mice were socially-housed in stable groups with compatible cage mates. Food and water was provided ad libitum. |
| 9. For experiments involving live vertebrates, include a statement of compliance with ethical regulations and identify the committee(s) approving the experiments.                                                                                                                                                                                                                 | N/A                                                                                                                                                                                                                                                                                                                                                                                                                                                                                                                                                                                                                                                                                                 |
| 10. We recommend consulting the ARRIVE guidelines (see link list at top right) (PLoS Biol. 8(6), e1000412, 2010) to ensure that other relevant aspects of animal studies are adequately reported. See author guidelines, under 'Reporting Guidelines'. See also: NIH (see link list at top right) and MRC (see link list at top right) recommendations. Please confirm compliance. | We confirm the compliance of the ARRIVE guidelines regarding the following steps of each experiment involving the use of animals: study design, sample size, inclusion and exclusion criteria, randomisation, blinding, outcome measures, statistical methods, experimental animals, experimental procedures and results.                                                                                                                                                                                                                                                                                                                                                                           |

#### E- Human Subjects

|                                                                                                                                                                                                                                                                                                                    |                                                                                                                                                                                                                                                                                                                                                                                                                                                                                                                                   |
|--------------------------------------------------------------------------------------------------------------------------------------------------------------------------------------------------------------------------------------------------------------------------------------------------------------------|-----------------------------------------------------------------------------------------------------------------------------------------------------------------------------------------------------------------------------------------------------------------------------------------------------------------------------------------------------------------------------------------------------------------------------------------------------------------------------------------------------------------------------------|
| 11. Identify the committee(s) approving the study protocol.                                                                                                                                                                                                                                                        | The study protocol was approved by UNIL; protocol #222-12                                                                                                                                                                                                                                                                                                                                                                                                                                                                         |
| 12. Include a statement confirming that informed consent was obtained from all subjects and that the experiments conformed to the principles set out in the WMA Declaration of Helsinki and the Department of Health and Human Services Belmont Report.                                                            | Discarded human foreskin samples were obtained from the Pediatric Surgery Department of Lausanne University Hospital with Human Ethics Institutional review board approval and signed formularies of informed patients' consent and self-reported country of origin. Written informed consent was obtained from all subjects (or their parents in case of minors) and the experiments were conformed to the principles set out in the WMA Declaration of Helsinki and the Department of Health and Human Services Belmont Report. |
| 13. For publication of patient photos, include a statement confirming that consent to publish was obtained.                                                                                                                                                                                                        | N/A                                                                                                                                                                                                                                                                                                                                                                                                                                                                                                                               |
| 14. Report any restrictions on the availability (and/or on the use) of human data or samples.                                                                                                                                                                                                                      | N/A                                                                                                                                                                                                                                                                                                                                                                                                                                                                                                                               |
| 15. Report the clinical trial registration number (at ClinicalTrials.gov or equivalent), where applicable.                                                                                                                                                                                                         | N/A                                                                                                                                                                                                                                                                                                                                                                                                                                                                                                                               |
| 16. For phase II and III randomized controlled trials, please refer to the CONSORT flow diagram (see link list at top right) and submit the CONSORT checklist (see link list at top right) with your submission. See author guidelines, under 'Reporting Guidelines'. Please confirm you have submitted this list. | N/A                                                                                                                                                                                                                                                                                                                                                                                                                                                                                                                               |
| 17. For tumor marker prognostic studies, we recommend that you follow the REMARK reporting guidelines (see link list at top right). See author guidelines, under 'Reporting Guidelines'. Please confirm you have followed these guidelines.                                                                        | N/A                                                                                                                                                                                                                                                                                                                                                                                                                                                                                                                               |

#### F- Data Accessibility

|                                                                                                                                                                                                                                                                                                                                                                                                                                                                                                                                                                                                                                                                                                   |                                                                                                                                                                                                                                                                                                                                                                                                                                                                                                                            |
|---------------------------------------------------------------------------------------------------------------------------------------------------------------------------------------------------------------------------------------------------------------------------------------------------------------------------------------------------------------------------------------------------------------------------------------------------------------------------------------------------------------------------------------------------------------------------------------------------------------------------------------------------------------------------------------------------|----------------------------------------------------------------------------------------------------------------------------------------------------------------------------------------------------------------------------------------------------------------------------------------------------------------------------------------------------------------------------------------------------------------------------------------------------------------------------------------------------------------------------|
| 18: Provide a "Data Availability" section at the end of the Materials & Methods, listing the accession codes for data generated in this study and deposited in a public database (e.g. RNA-Seq data: Gene Expression Omnibus GSE39462, Proteomics data: PRIDE PXD000208 etc.) Please refer to our author guidelines for 'Data Deposition'.<br><br>Data deposition in a public repository is mandatory for:<br>a. Protein, DNA and RNA sequences<br>b. Macromolecular structures<br>c. Crystallographic data for small molecules<br>d. Functional genomics data<br>e. Proteomics and molecular interactions                                                                                        | The datasets produced in this study are available in the following databases: •Genotyping data: Gene Expression Omnibus GSE156977 (https://www.ncbi.nlm.nih.gov/geo/query/acc.cgi?acc=GSE156977)<br>•Affychip ClariomD data – Black vs White cohort: Gene Expression Omnibus GSE156011 (https://www.ncbi.nlm.nih.gov/geo/query/acc.cgi?acc=GSE156011)<br>•Affychip ClariomD data – White HKC with HSD17B7 overexpression: Gene Expression Omnibus GSE172288 (https://www.ncbi.nlm.nih.gov/geo/query/acc.cgi?acc=GSE172288) |
| 19. Deposition is strongly recommended for any datasets that are central and integral to the study; please consider the journal's data policy. If no structured public repository exists for a given data type, we encourage the provision of datasets in the manuscript as a Supplementary Document (see author guidelines under 'Expanded View' or in unstructured repositories such as Dryad (see link list at top right) or Figshare (see link list at top right).                                                                                                                                                                                                                            | All generated datasets have been deposited in Gene Expression Omnibus database                                                                                                                                                                                                                                                                                                                                                                                                                                             |
| 20. Access to human clinical and genomic datasets should be provided with as few restrictions as possible while respecting ethical obligations to the patients and relevant medical and legal issues. If practically possible and compatible with the individual consent agreement used in the study, such data should be deposited in one of the major public access-controlled repositories such as dbGAP (see link list at top right) or EGA (see link list at top right).                                                                                                                                                                                                                     | N/A                                                                                                                                                                                                                                                                                                                                                                                                                                                                                                                        |
| 21. Computational models that are central and integral to a study should be shared without restrictions and provided in a machine-readable form. The relevant accession numbers or links should be provided. When possible, standardized format (SBML, CellML) should be used instead of scripts (e.g. MATLAB). Authors are strongly encouraged to follow the MIRIAM guidelines (see link list at top right) and deposit their model in a public database such as Biocompare (see link list at top right) or JWS Online (see link list at top right). If computer source code is provided with the paper, it should be deposited in a public repository or included in supplementary information. | N/A                                                                                                                                                                                                                                                                                                                                                                                                                                                                                                                        |

#### G- Dual use research of concern

|                                                                                                                                                                                                                                                                                               |     |
|-----------------------------------------------------------------------------------------------------------------------------------------------------------------------------------------------------------------------------------------------------------------------------------------------|-----|
| 22. Could your study fall under dual use research restrictions? Please check biosecurity documents (see link list at top right) and list of select agents and toxins (APHIS/CDC) (see link list at top right). According to our biosecurity guidelines, provide a statement only if it could. | N/A |
|-----------------------------------------------------------------------------------------------------------------------------------------------------------------------------------------------------------------------------------------------------------------------------------------------|-----|
